# Supplementary material for: Au NPs driven electrochemiluminescence aptasensors for sensitive detection of fumonisin B1
Source: Royal Society of Chemistry journal article supplement (doi:10.1039/c4ra10350e), 2014-01-01
Supplement: c4ra10350e1.pdf [file c4ra10350e1.pdf]

## Electronic Supplementary Information

# Au NPs driven electrochemiluminescence aptasensors for sensitive detection of Fumonisin B1

Yuan Zhao, Yaodong Luo, Tongtong Li, Qijun Song\*

*The Key Lab of Food Colloids and Biotechnology, Ministry of Education, School of Chemical and Material*

*Engineering, Jiangnan University, Wuxi, Jiangsu, 214122, PRC. E-mail: [qsong@jiangnan.edu.cn](mailto:qsong@jiangnan.edu.cn);*

### **Captions:**

**Table S1.** The sequences of aptamer and the partial complementary DNA.

**Fig. S1** Detail schematic illustration of Au NPs-Ir complex driven ECL-aptasensors.

**Table S1.** The sequences of aptamer and the partial complementary DNA.

| Name                                  | Sequence (5'-3')                                                                                                                                                           |
|---------------------------------------|----------------------------------------------------------------------------------------------------------------------------------------------------------------------------|
| Aptamer                               | -SH-(CH <sub>2</sub> ) <sub>6</sub> -ATA CCA GCT TAT TCA ATT AAT CGC ATT ACC<br>TTA TAC CAG CTT ATT CAA TTA CGT CTG CAC ATA CCA<br>GCT TAT TCA ATT AGA TAG TAA GTG CAA TCT |
| Complementary DNA                     | -SH-(CH <sub>2</sub> ) <sub>6</sub> -AGA TTG CAC TTA CTA TCT AAT TGA ATA AGC<br>TGG TAT GTG CAG ACG TAA TTG AAT AAG CTG GTA TAA<br>GGT AAT GCG ATT AAT TGA ATA AGC TGG TAT |
| Partial complementary<br>DNA (PC-DNA) | -SH-(CH <sub>2</sub> ) <sub>6</sub> -AAT TGA ATA AGC TGG TAT                                                                                                               |

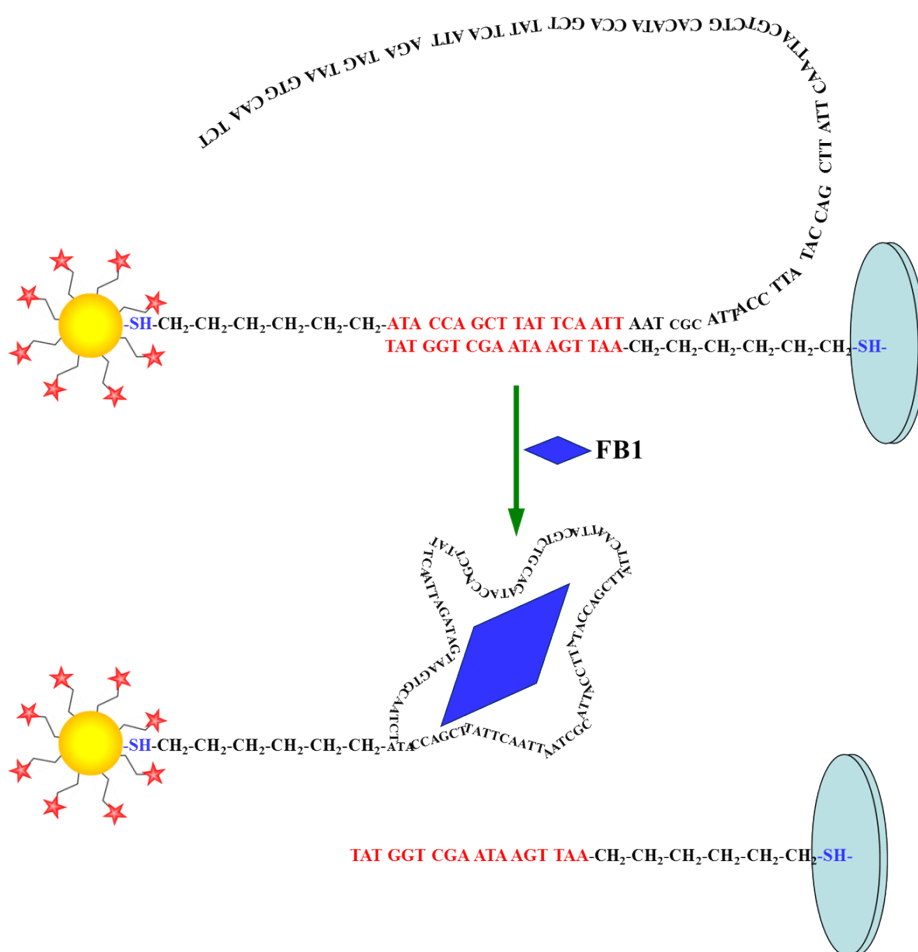

**Fig. S1** Detail schematic illustration of Au NPs-Ir complex driven ECL-aptasensors.
